# Supplementary material for: Visual routines are associated with specific graph interpretations
Source: Springer Nature journal article supplement (doi:10.1186/s41235-017-0059-2), 2017-03-17
Supplement: 41235_2017_59_MOESM2_ESM.pdf [file 41235_2017_59_MOESM2_ESM.pdf]

Experiment 1a (**Size** for Orthogonal Task)

Experiment 1b (**Contrast** for Orthogonal Task)

Sample Participant 1  
(Prefers Tall & Dark)

Sample Participant 2  
(Prefers Short & Light)

Sample Participant 3  
(Prefers Short & Dark)

Sample Participant 4  
(Prefers Tall & Light)

What is the  
*Size*  
relation?  
  
(Size  
varies)

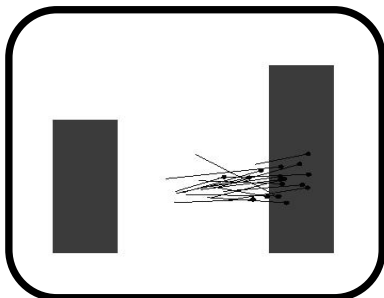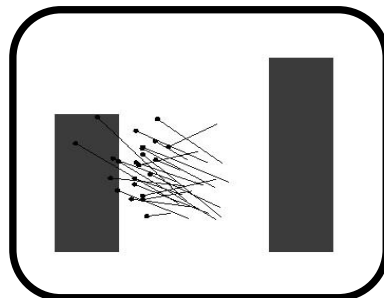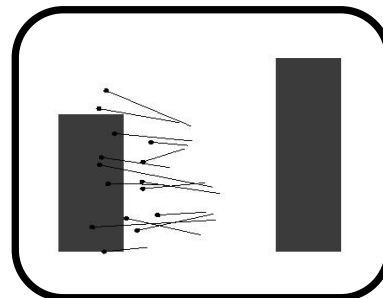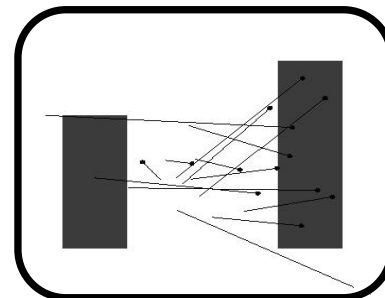

What is the  
*Contrast*  
relation?  
  
(Contrast  
varies)

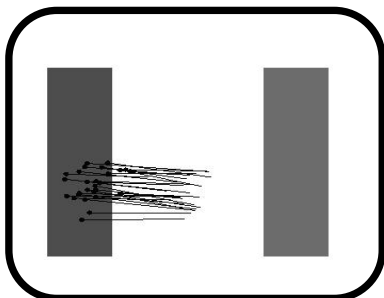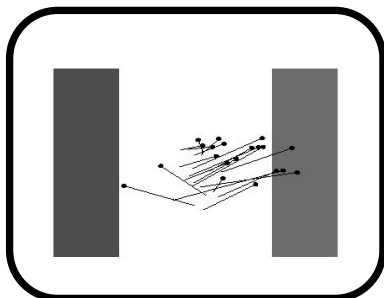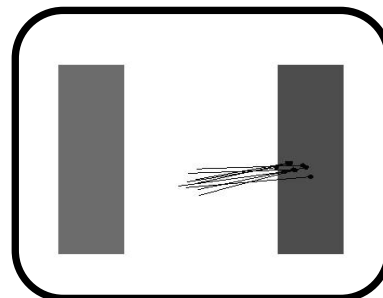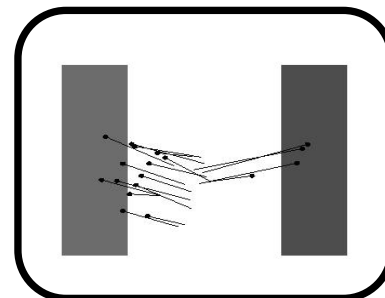

**Size** Relation?  
Ignore *Contrast*

**Size** Relation?  
Ignore *Contrast*

**Contrast** Relation?  
Ignore *Size*

**Contrast** Relation?  
Ignore *Size*

Orthogonal,  
manipulated  
between-  
subjects  
  
(Size and  
contrast  
vary)

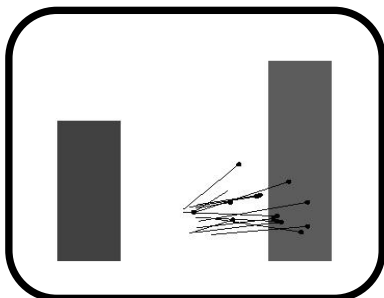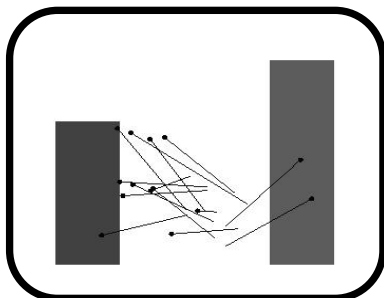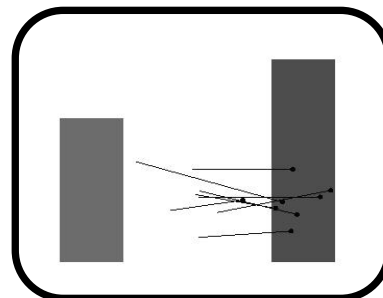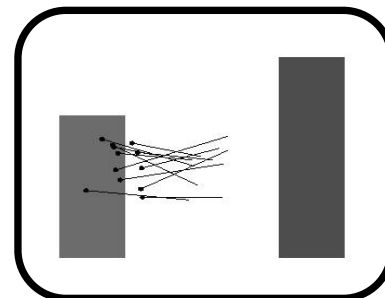

Saccades match **Size**  
preference, not **Contrast**

Saccades match **Size**  
preference, not **Contrast**

Saccades match **Contrast**  
preference, not **Size**

Saccades match **Contrast**  
preference, not **Size**
